# Supplementary material for: Polyvinyl trisulfonate ethylamine based solid acid catalyst for the efficient glycosylation of sugars under solvent free conditions
Source: Royal Society of Chemistry journal article supplement (doi:10.1039/c5ra20300g), 2015-01-01
Supplement: c5ra20300g1.pdf [file c5ra20300g1.pdf]

## Supplementary information

- Figures S<sub>1</sub>, S<sub>2</sub>, S<sub>3</sub>, and S<sub>4</sub> are for elemental analysis of PV-DEA, PV-TEAC, PV-TSEAC and PV-DSEA respectively.
- <sup>1</sup>H NMR and <sup>13</sup>C NMR of synthesized glycoside product of sugar with using different alcohol.

Figures S<sub>1</sub>, S<sub>2</sub>, S<sub>3</sub>, and S<sub>4</sub> are for elemental analysis of PV-DEA, PV-TEAC, PV-TSEAC and PV-DSEA respectively.

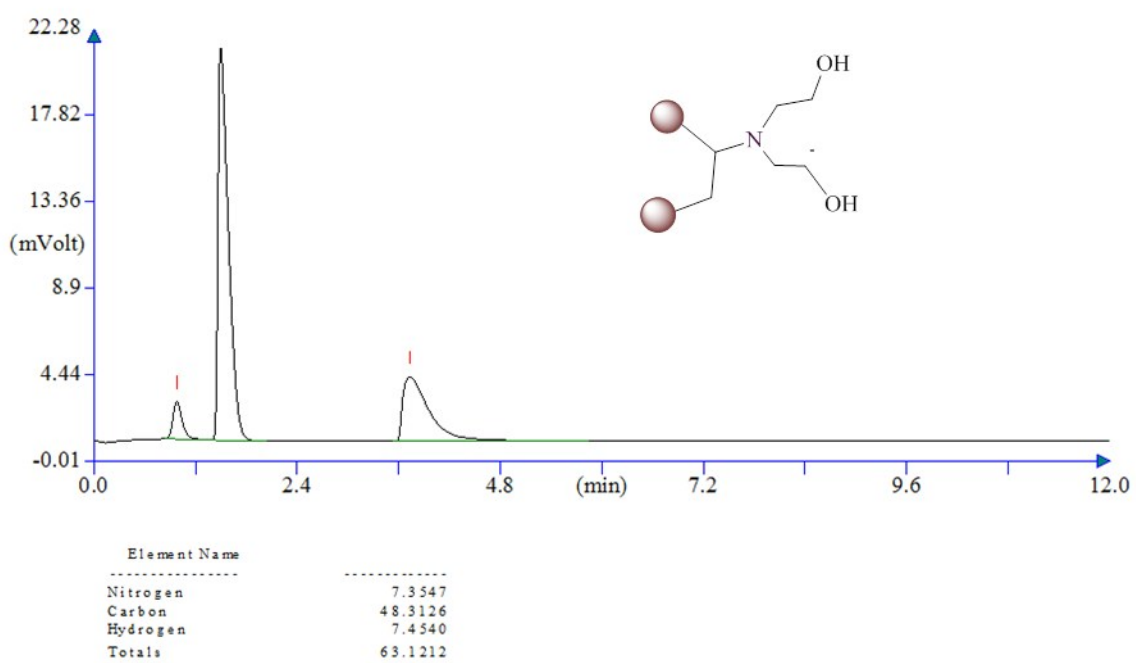

Figure S<sub>1</sub>

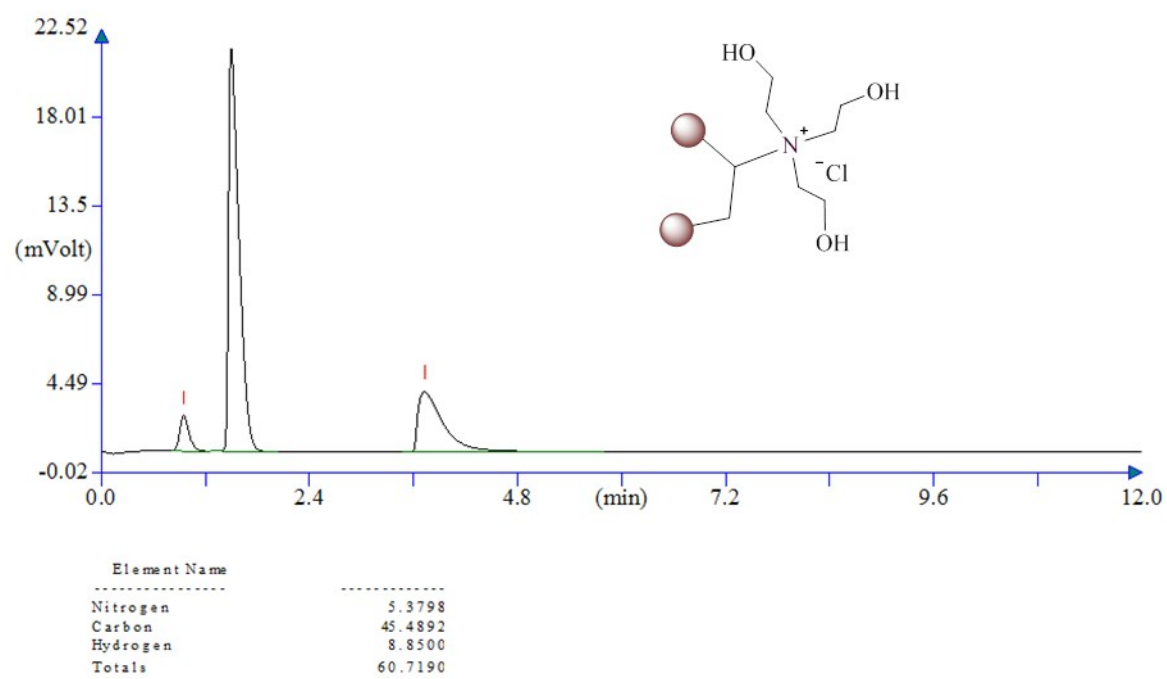

Figure S<sub>2</sub>

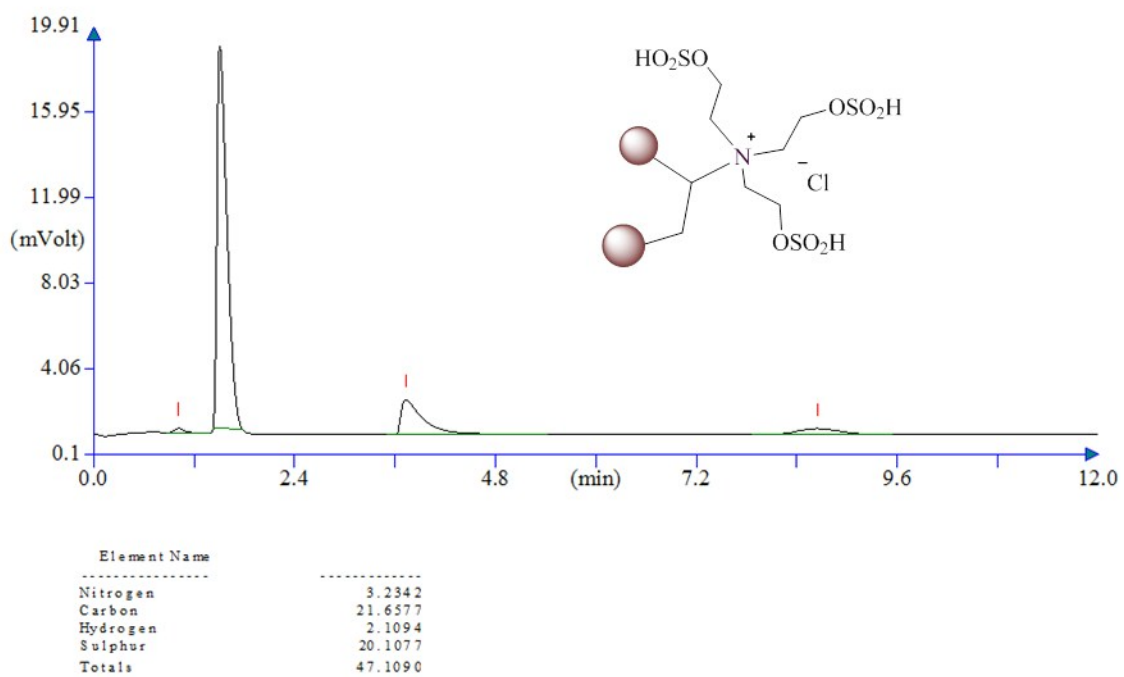

**Figure S<sub>3</sub>**

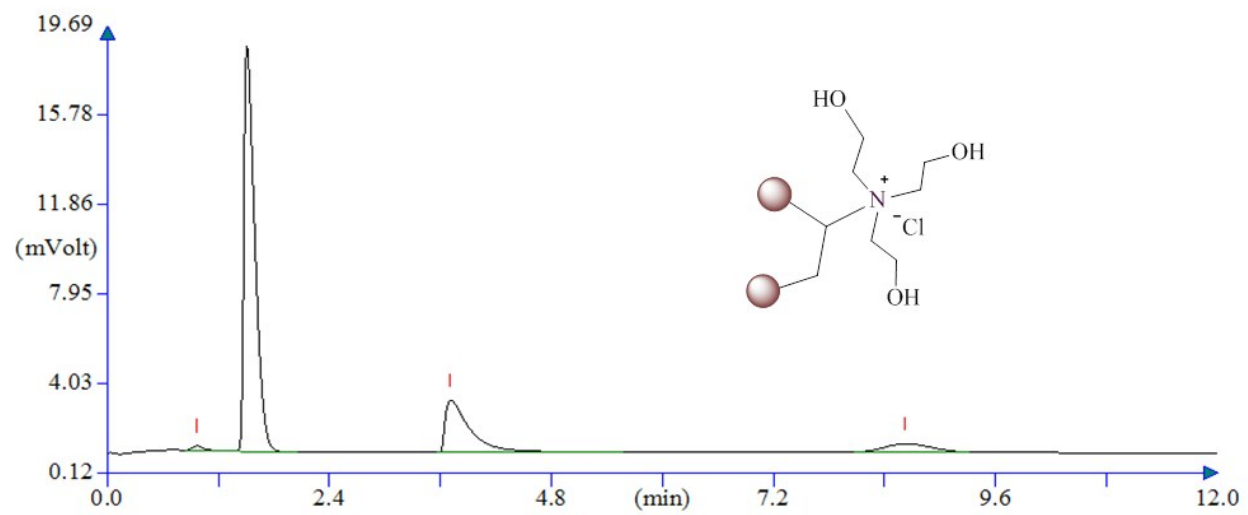

| Element Name |         |
|--------------|---------|
| Nitrogen     | 3.2736  |
| Carbon       | 30.9331 |
| Hydrogen     | 3.1312  |
| Sulphur      | 15.8198 |
| Totals       | 53.1577 |

**Figure S<sub>4</sub>**

**$^1\text{H}$  NMR and  $^{13}\text{C}$  NMR of synthesized glycoside product of sugar with using different alcohol**

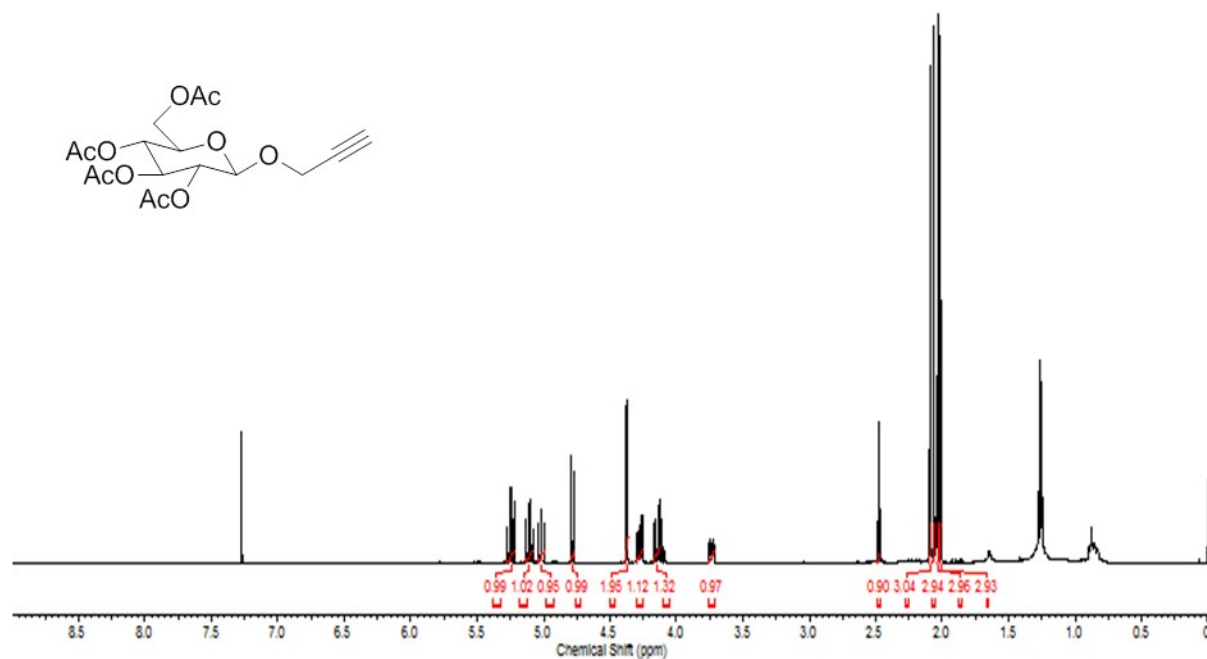

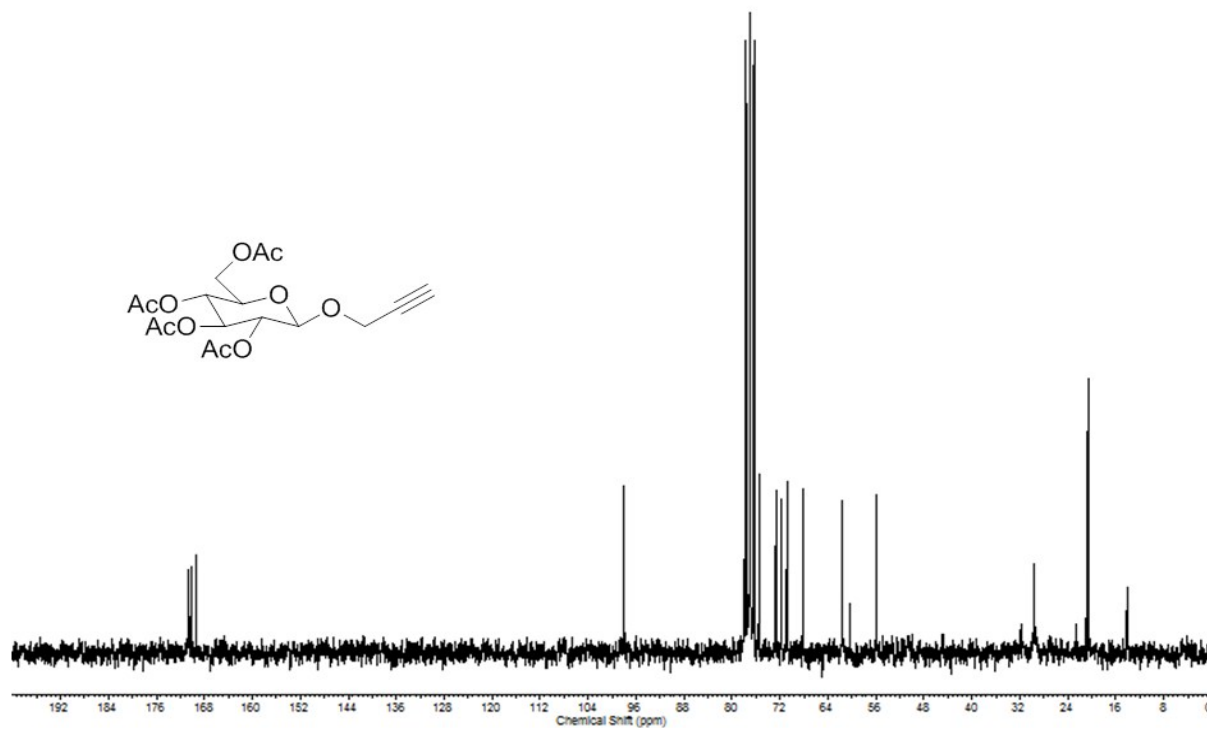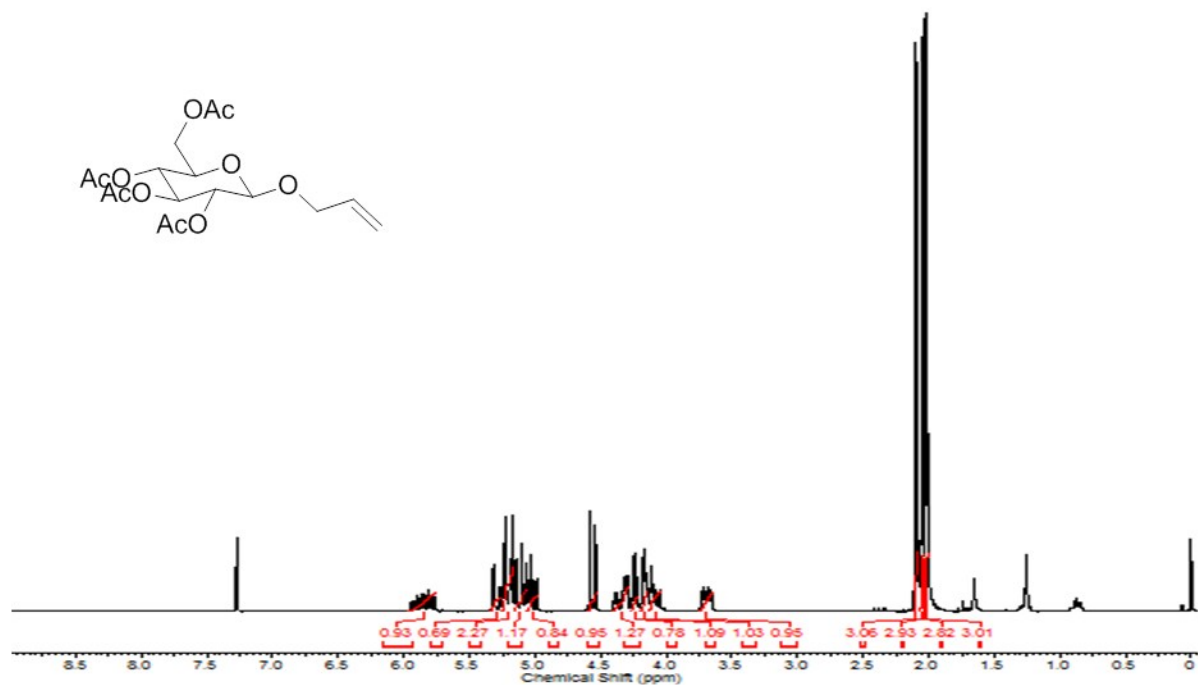

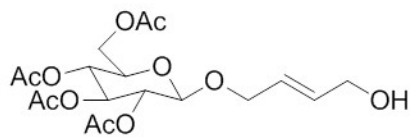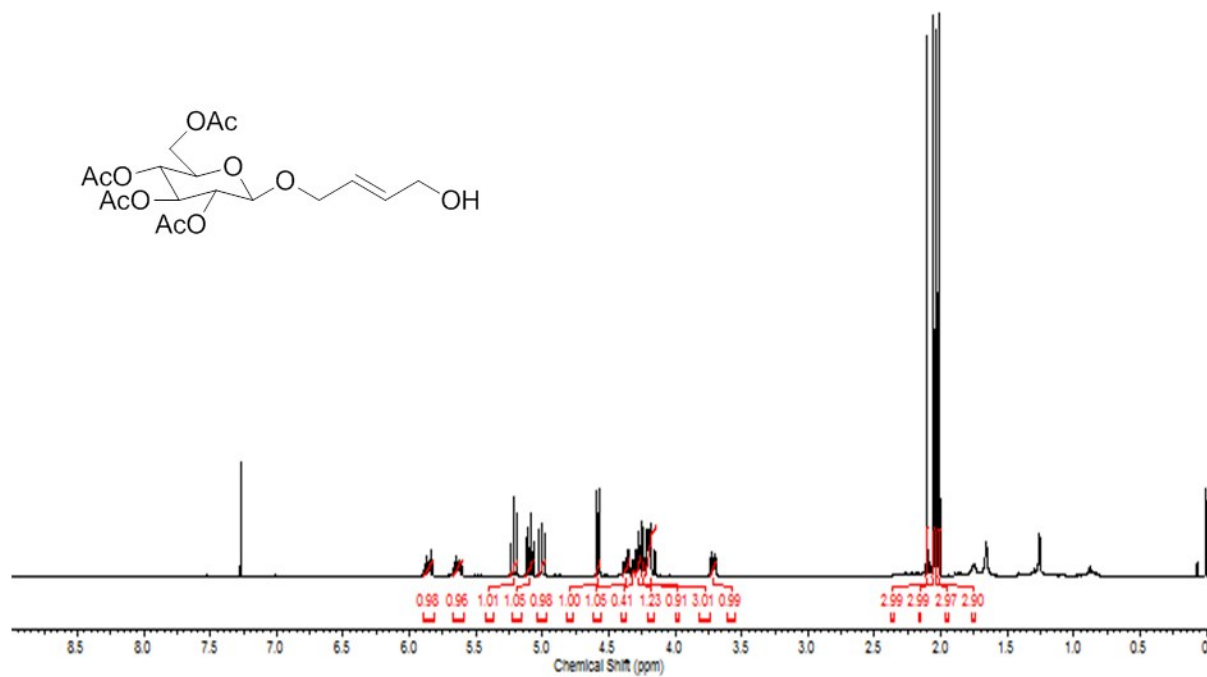



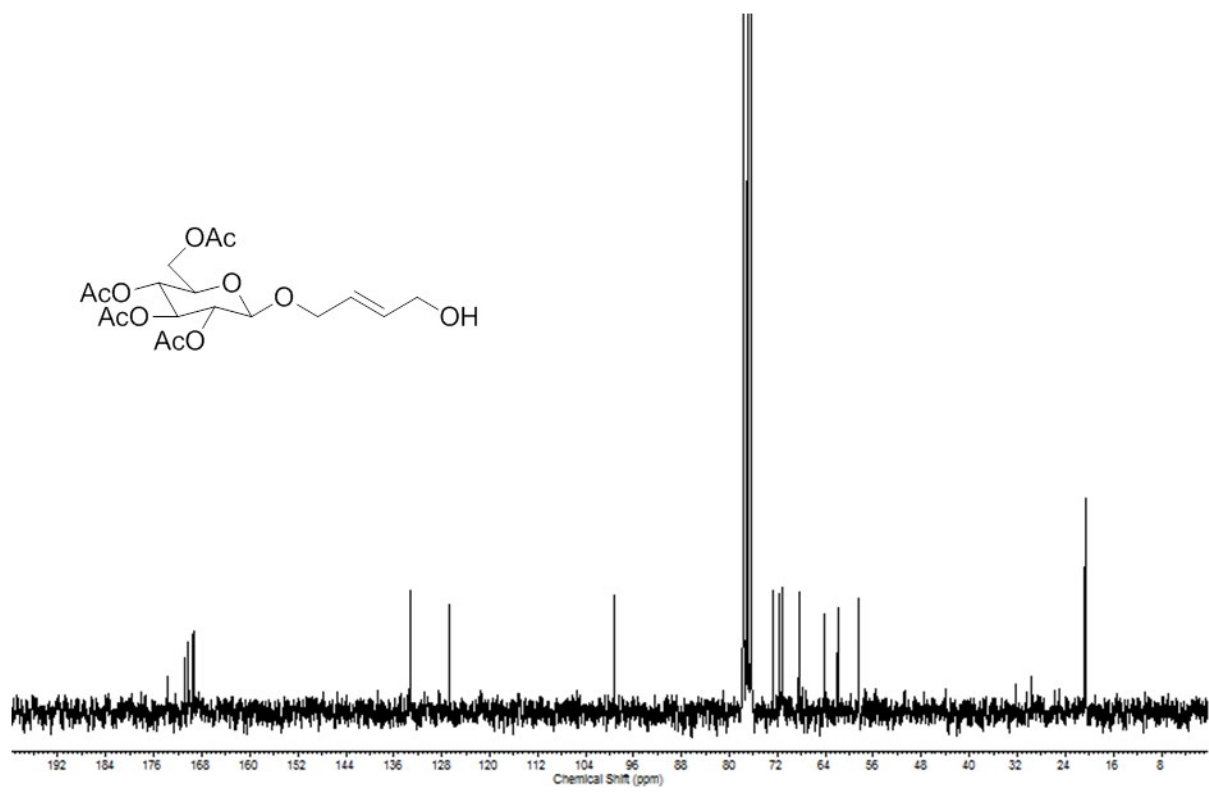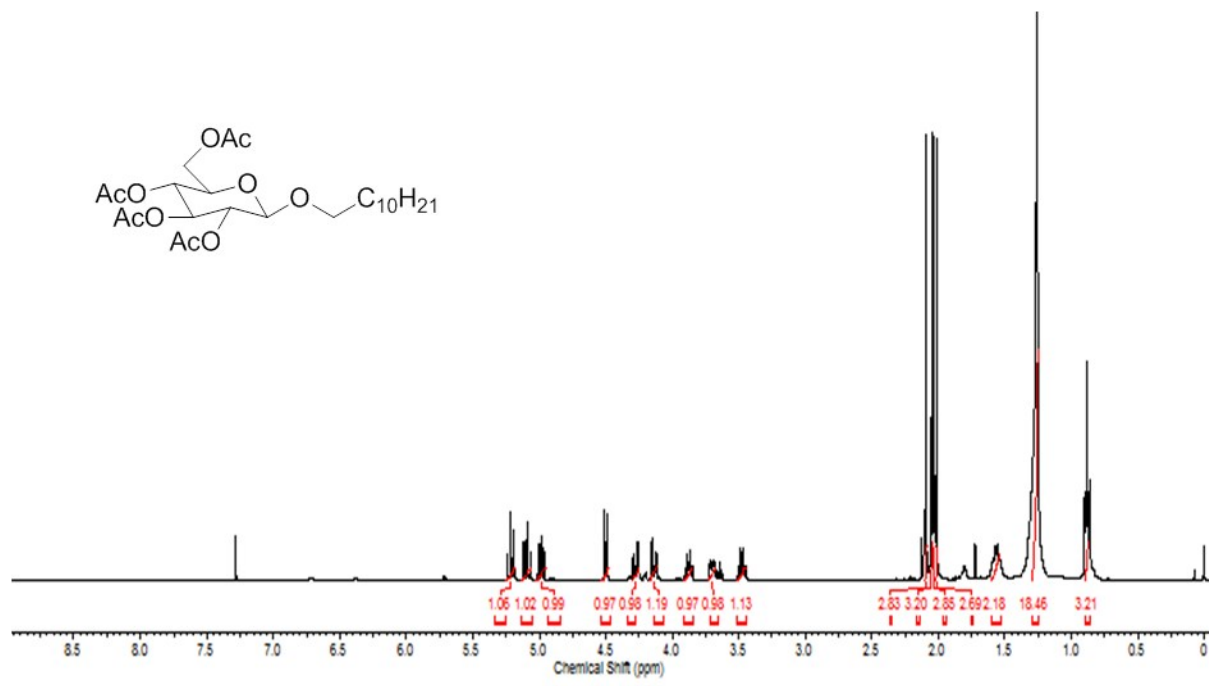

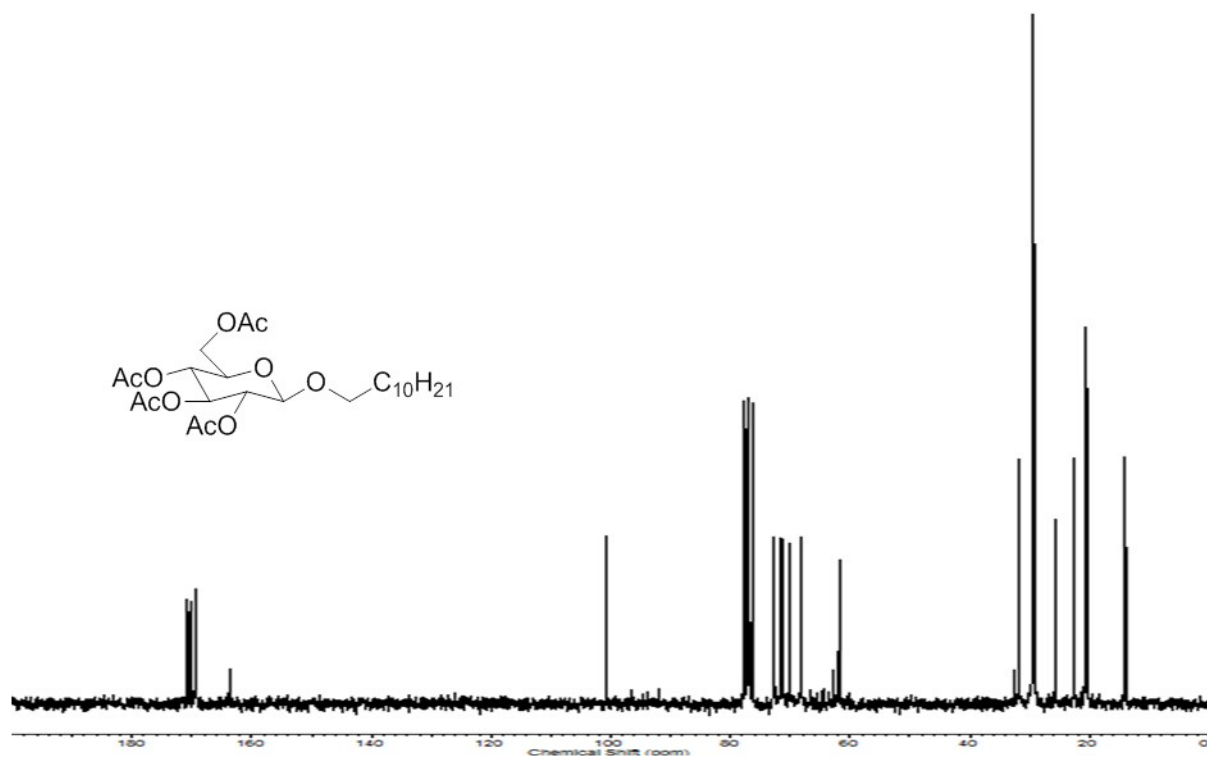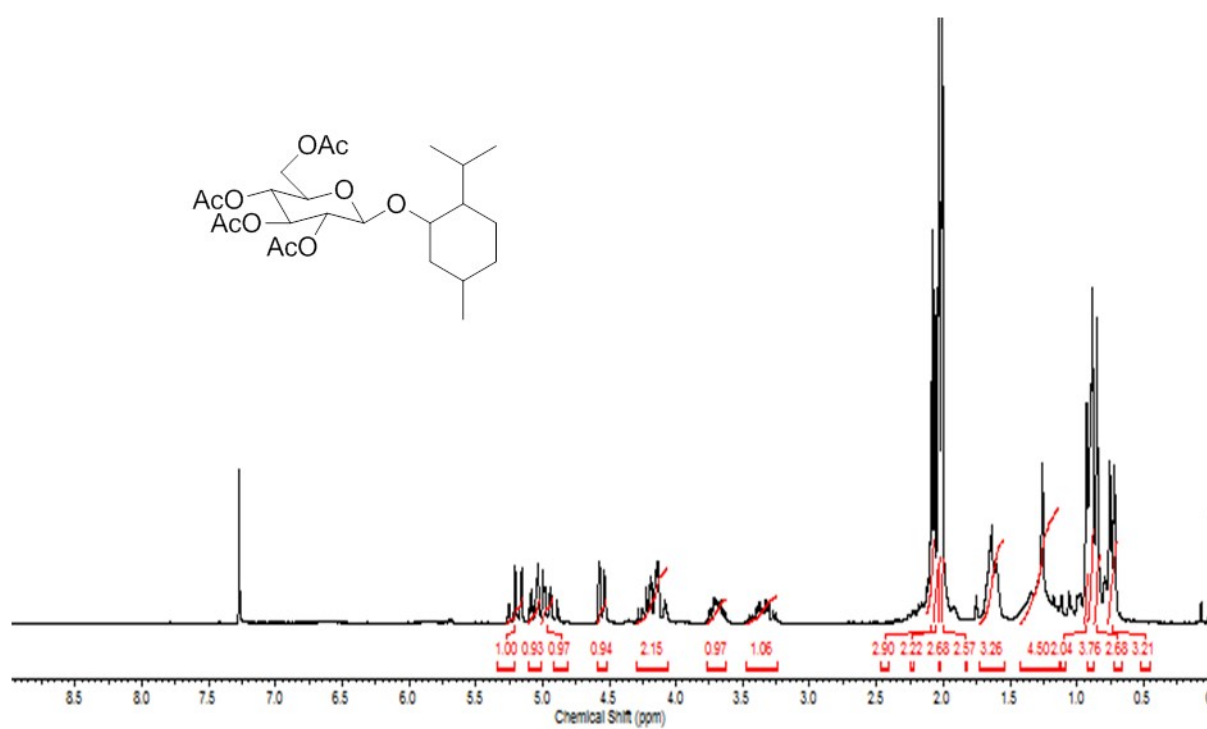

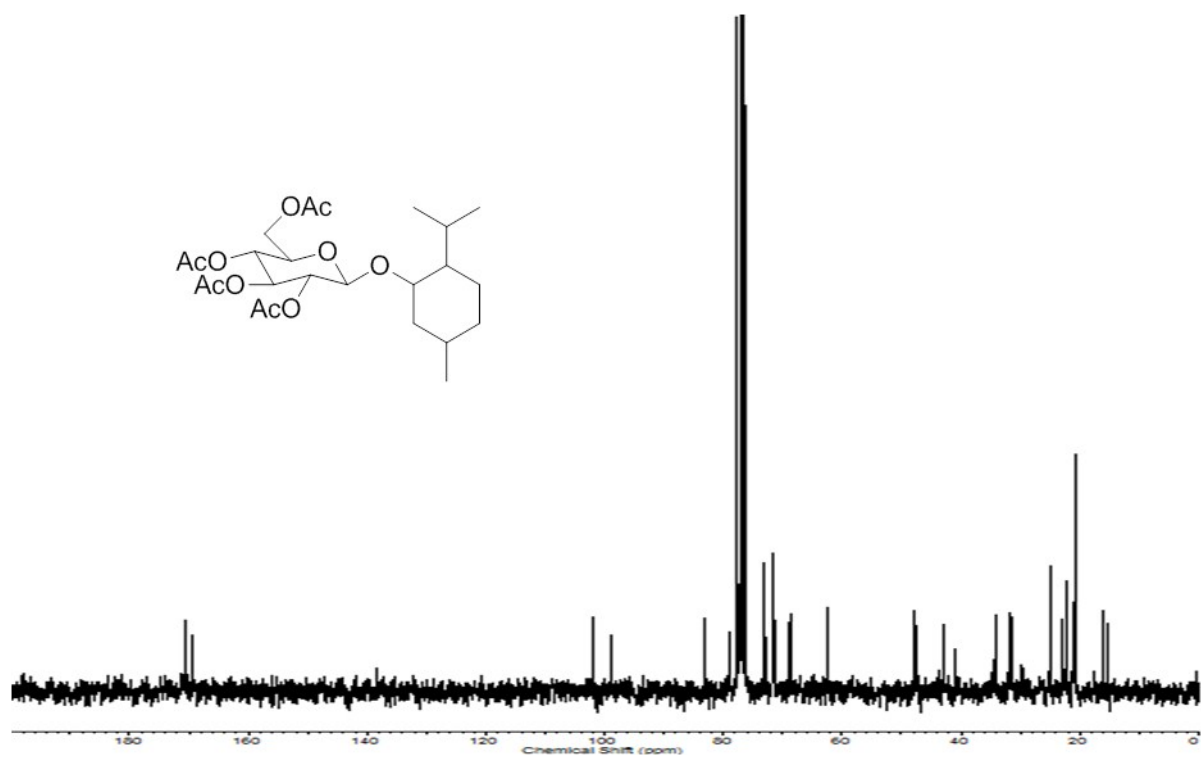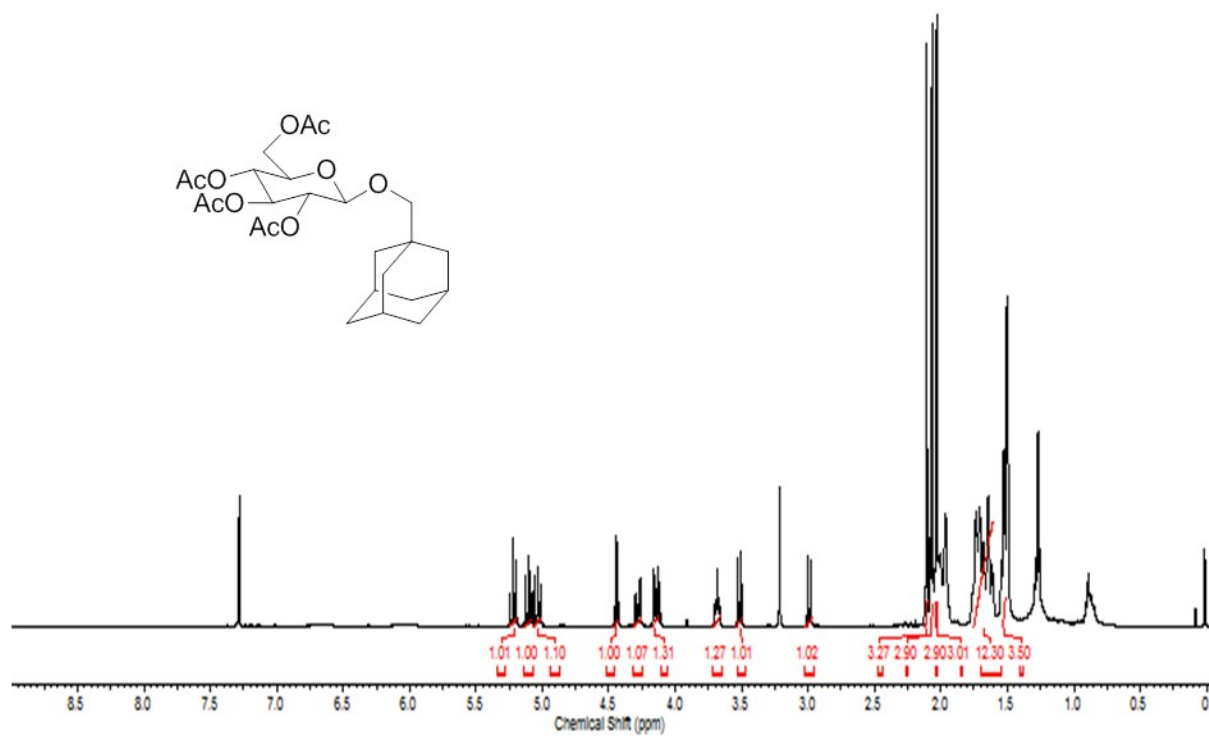

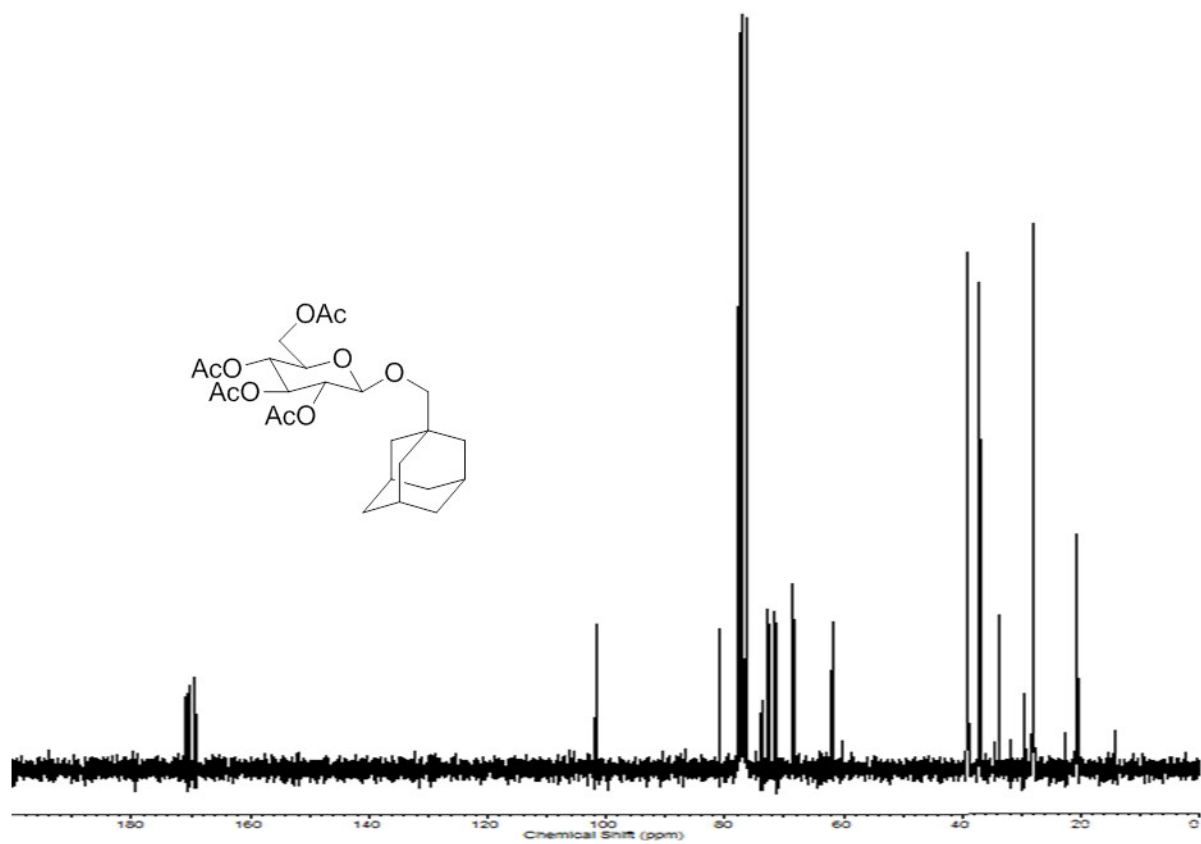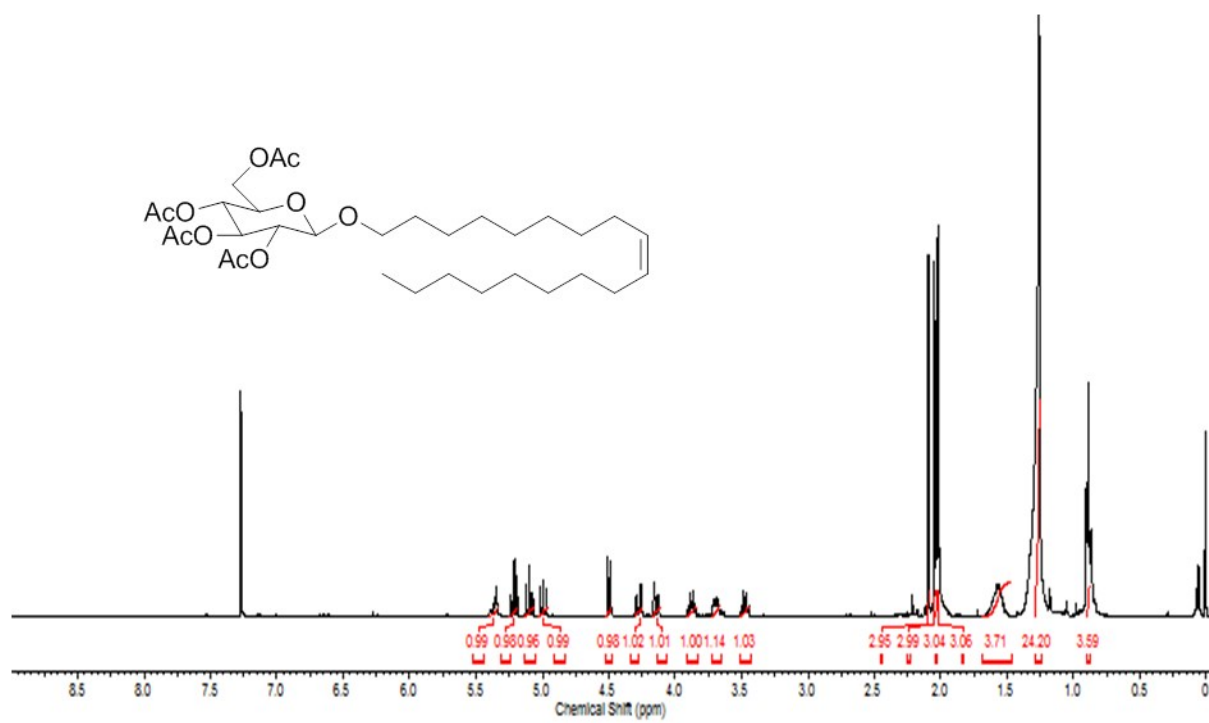

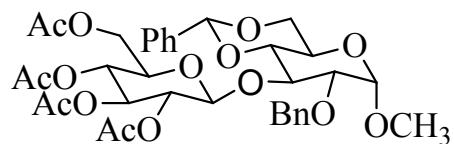

$^1\text{H}$  NMR ( $\text{CDCl}_3$ , 400 MHz)  $\delta$  1.98 and 2.01 (3 $\times$ s, acetyl  $\text{CH}_3$ ), 3.35 (s,  $-\text{OCH}_3$ ), 4.22 (1H, d,  $J_1 = 7.2$  Hz, H-1), 4.45 (1H, d,  $J_1 = 3.8$  Hz, H-1), 5.56 (1H, s, benzyldiene CH).  $^{13}\text{C}$  NMR ( $\text{CDCl}_3$ , 50 MHz) 21.7 (3 $\times$ acetyl  $\text{CH}_3$ ), 55.1 (3 $\times$  $-\text{OCH}_3$ ), 102.2, 98.3 and 100.5 (benzyldiene and anomeric CH), 167.9 and 171.7 (acetyl CO), 154.9; Yield 86%.
